# Supplementary material for: Circularly polarised luminescence in an RNA-based homochiral, self-repairing, coordination polymer hydrogel
Source: Royal Society of Chemistry journal article supplement (doi:10.1039/d2tc00366j), 2022-01-01
Supplement: d2tc00366j1.pdf [file d2tc00366j1.pdf]

## Circularly polarised luminescence in a homochiral, self-repairing, coordination polymer hydrogel

Osama El-Zubir,<sup>a</sup> Pablo Rojas Martinez,<sup>a</sup> Gema Dura,<sup>ab</sup> Lamia L.G. Al-Mahamad,<sup>c</sup> Thomas Pope,<sup>a</sup> Thomas J. Penfold,<sup>a</sup> Lewis E. Mackenzie,<sup>d</sup> Robert Pal,<sup>d</sup> Jackie Mosely,<sup>d</sup> Fabio Cucinotta,<sup>a</sup> Liam F. McGarry,<sup>a</sup> Benjamin R. Horrocks<sup>a</sup> and Andrew Houlton<sup>\*a</sup>

<sup>a</sup> *Chemical Nanoscience Labs, Chemistry, School of Natural Sciences, Newcastle University, Newcastle upon Tyne, NE1 7RU, U.K.*

<sup>b</sup> *Departamento de Química Inorgánica, Orgánica y Bioquímica, Facultad de Ciencias y Tecnologías Químicas, UCLM, Spain.*

<sup>c</sup> *Department of Chemistry, College of Science, Mustansiriyah University, Baghdad, Iraq.*

<sup>d</sup> *Department of Chemistry, Durham University, South Road, Durham, DH1 3LE, UK.*

<sup>\*</sup> *Corresponding author. Email: andrew.houlton@ncl.ac.uk.*

### Supplementary Information

#### Table of Contents

|                                                                           |    |
|---------------------------------------------------------------------------|----|
| METHODS .....                                                             | 2  |
| MATERIALS. ....                                                           | 2  |
| PREPARATION OF 1. ....                                                    | 2  |
| ATOMIC FORCE MICROSCOPY (AFM).....                                        | 2  |
| ULTRAVIOLET-VISIBLE SPECTROSCOPY (UV-Vis).....                            | 2  |
| FTIR SPECTROSCOPY. ....                                                   | 2  |
| MATRIX-ASSISTED LASER DESORPTION/IONIZATION SPECTROMETRY (MALDI-TOF)..... | 2  |
| POWDER X-RAY DIFFRACTION (XRD).....                                       | 2  |
| FLUORESCENCE SPECTROSCOPY. ....                                           | 2  |
| CIRCULAR DICHROISM. ....                                                  | 3  |
| COMPUTATIONAL DETAILS. ....                                               | 3  |
| RHEOLOGY. ....                                                            | 3  |
| SCANNING ELECTRON MICROSCOPY (SEM).....                                   | 3  |
| CIRCULARLY POLARIZED LUMINESCENCE (CPL). ....                             | 3  |
| SUPPLEMENTARY TABLES AND FIGURES .....                                    | 4  |
| SUPPLEMENTARY REFERENCES .....                                            | 14 |

## Methods

**Materials.** All reagents were obtained from Sigma-Aldrich. Deionised water (18 M $\Omega$  cm resistivity) was obtained from a Direct-Q® 3 UV Water Purification System (Merck).

**Preparation of 1.** Ag-thioguanosine, **1**, prepared as follows. An aqueous suspension of 6-thioguanosine (6TG-H) was sonicated for 1 hour to achieve a fine dispersion to which was added a molar equivalent of AgNO<sub>3</sub> (solid). The reaction mixture was stirred for hour. As an example, a gel sample at concentration of 30 mmol<sup>-1</sup> was prepared by sonication of 18.0 mg of 6-thioguanosine in 2 ml of water for 1 hour. Then, the suspension was mixed with 10.2 mg of finely powdered AgNO<sub>3</sub>. After the addition the mixture was stirred for an hour. Over the course of this period a yellow pale gel formed, which was indicated by the inverted-vial test (Fig. 1). There is no effect of stir direction has been notice on the gel (SI Fig. 6c).

**Atomic Force Microscopy (AFM).** AFM data was acquired using a Multimode 8 atomic force microscope with a NanoscopeV controller (Bruker), and a ‘‘E’’ scanner. Nanoscope software version 9.1 was used to control the microscope. The system was operated in ScanAsyst in Air mode as a peak force tapping mode at ultra-low forces minimise damage to the samples. For reducing vibrational noise, an isolation table/acoustic enclosure was used (Veeco Inc., Metrology Group). Silicon tips on silicon nitride cantilevers (ScanAsyst, Bruker) were used for imaging. The nominal tip radius was approximately 2 nm, resonant frequency 150 kHz and spring constant  $k \sim 0.7 \text{ Nm}^{-1}$ . The AFM data were analysed with NanoScope Analysis 1.5 software (Bruker). The sample was prepared by adding 2 $\mu$ l of freshly prepared dilute aqueous solution of **1** onto a clean silicon wafer and drying in air.

**Ultraviolet-Visible Spectroscopy (UV-Vis).** Absorption spectra (in the range of 190-850 nm) were recorded in a NanoDrop™ One<sup>C</sup> UV-Vis spectrophotometer. UV-Vis spectra of an aqueous solutions of 6-thioguanosine in at concentrations of 1 mmol l<sup>-1</sup> and of Ag-thioguanosine (as an aqueous solution at concentrations of 1 mmol l<sup>-1</sup> and as gel at concentration of 30 mmol l<sup>-1</sup>) were recorded in a quartz cuvette with path length 0.1 mm. The spectrometer was blanked using Nanopure water.

**FTIR spectroscopy.** FTIR Spectra (in the range of 600 to 4000 cm<sup>-1</sup> wavenumbers) were recorded using the ATR accessory of an IRAffinity-1S Fourier transform infrared spectrophotometer (Shimadzu) at 4 cm<sup>-1</sup> spectral resolution. For each spectrum, 64 scans were co-added and averaged. The bare ATR accessory was used as a background. A sample of Ag-6TG was dried in air for 1 day prior to analysis and then deposited on a clean p-Si(100) chip (1 cm<sup>2</sup>).

**Matrix-assisted laser desorption/ionization Spectrometry (MALDI-Tof).** MALDI spectrum was recorded on a Bruker Autoflex II ToF/ToF Mass Spectrometer. Ag-6TG hydrogel (60 mmol l<sup>-1</sup>) was diluted in ultrapure water 100 times and 1 $\mu$ L was mixed in 9 $\mu$ L acetonitrile solution of  $\alpha$ -cyano-4-hydroxycinnamic acid as a matrix.

**Powder X-ray Diffraction (XRD).** Very slow dehydration of the gel over 14 days yielded a fibrous green-yellow powder that exhibited a main Bragg diffraction ring at 3.03 Å.

**Fluorescence spectroscopy.** Emission spectroscopy (in the range 250-1000 nm) was recorded on a SPEX Fluoromax spectrofluorimeter. Emission spectra of solutions of 6-thioguanosine in 0.1 mol l<sup>-1</sup> of NaOH (at concentrations of 1 mmol l<sup>-1</sup> and 30 mmol l<sup>-1</sup>) and of Ag-thioguanosine (as an aqueous solution at concentrations of 1 mmol l<sup>-1</sup> and as gel at concentration of 30 mmol l<sup>-1</sup>) were recorded in a quartz cuvette with pathlength 10 mm. The excitation wavelength was 350 nm for the solutions and 430 nm for the gel.

**Circular dichroism.** Circular dichroism spectra were recorded on a Jasco J-810 Spectropolarimeter. CD spectra of 6-thioguanosine solution (10 mmol l<sup>-1</sup>) in 0.1 M of NaOH and Ag-thioguanosine as a gel (at concentration of 10 mmol l<sup>-1</sup>) were recorded in a quartz cell with pathlength 0.1 mm.

**Computational details.** All TDDFT calculations were performed with the ORCA quantum chemistry package<sup>1,2</sup> within the Tamm–Dancoff approximation.<sup>3</sup> All atoms were modelled with an all-electron Gaussian basis set of triple- $\zeta$  valence quality (def2TZVP)<sup>4</sup> along with the hybrid-level PBE0 exchange-correlation functional<sup>5</sup> and the semiempirical D3 Grimme dispersion correction.<sup>6</sup> The water solvent was simulated by employing the conductor-like polarizable continuum model.<sup>7</sup> Firstly, a geometry optimisation was performed on the crystal structure. From the optimised structure, we generated structures of increasing length, from 1 to 7 units - where one unit contains one silver atom and its associated organic neighbours. These unit structures were used to calculate all the excited states with a wavelength of 150 nm or more, along with the associated origin-independent velocity rotatory strengths,  $R_i$ .<sup>8</sup> We model the circular dichroism spectra,  $\Delta\varepsilon$ , as the sum of Gaussian functions, each centred on the excitation energy  $E_i$ , whose amplitude is related to the rotatory strength and whose width,  $\sigma = 0.04E_i$ , is chosen empirically to best reproduce the experimental line shape,

$$\Delta\varepsilon = \frac{1}{k_R} \frac{1}{\sqrt{\pi}\sigma} \sum_i E_i R_i e^{-[(E-E_i)/\sigma]^2} \quad (1)$$

**Rheology.** Rheological measurements were performed with a HR-2 Discovery Hybrid Rheometer (TA Instruments) with a standard steel parallel-plate geometry of 20 mm diameter with a gap of 1 mm. The strain and the frequency were set to 1% and 1 Hz, respectively.

**Scanning electron microscopy (SEM).** Samples of xerogel Xel were dried on silicon wafers or freezing dried. The SEM images were collected using a TESCAN VEGA LMU Scanning Electron Microscope, housed within EM Research Services, Newcastle University. Digital images collected with TESCAN supplied software.

**Circularly polarized luminescence (CPL).** CPL spectra were recording using a custom-build CPL spectrometer. Full details of this CPL spectrometer have been reported by Carr et al.<sup>9</sup> Non-standard protocols were followed to measure CPL from the gel samples. Total emission and CPL emission were sampled at 400 - 800 nm in 5 nm increments, with 20 accumulated spectra per measurement. Roughly 500 micro-liters of the gel sample was contained in an open-topped quartz cuvette (101-10-40, Hellma). The gel adhered to a corner of the cuvette. Excitation was provided by a 410 nm laser source from directly above the sample. The laser and sample were positioned to maximise emission intensity from the sample. Data was processed using custom-written Matlab scripts (Matlab 2019b, Mathworks). Instrumental baselines for total emission intensity and CPL emission were subtracted to zero measurements as appropriate and were then smoothed using an intensity-preserving Savitzky-Golay filter.  $g_{lum}$  values for each repeated measurement were calculated from smoothed intensity and smoothed CPL emission. This was verified across 6 independent measurements. Quoted uncertainty is the standard deviation of  $g_{lum}$  of these six independent measurements. The uncertainty of the presented data is the standard deviation of 6 independent measurements.

## Supplementary tables and figures

**Supplementary Table 1.** Wavelengths and rotatory strengths of the four excitations used to approximately reproduce the complete spectra. Also included is the angle between the electric and magnetic transition velocity dipoles.

| State | ID  | Wavelength (nm) | $R_i(10^{40}\text{cgs})$ | Angle (Deg) |
|-------|-----|-----------------|--------------------------|-------------|
| c     | 569 | 199.6           | -71.4                    | 116.7       |
| d     | 327 | 216.0           | 48.3                     | 42.6        |
| e     | 223 | 227.6           | -113.5                   | 173.0       |
| f     | 22  | 297.6           | 67.8                     | 76.0        |

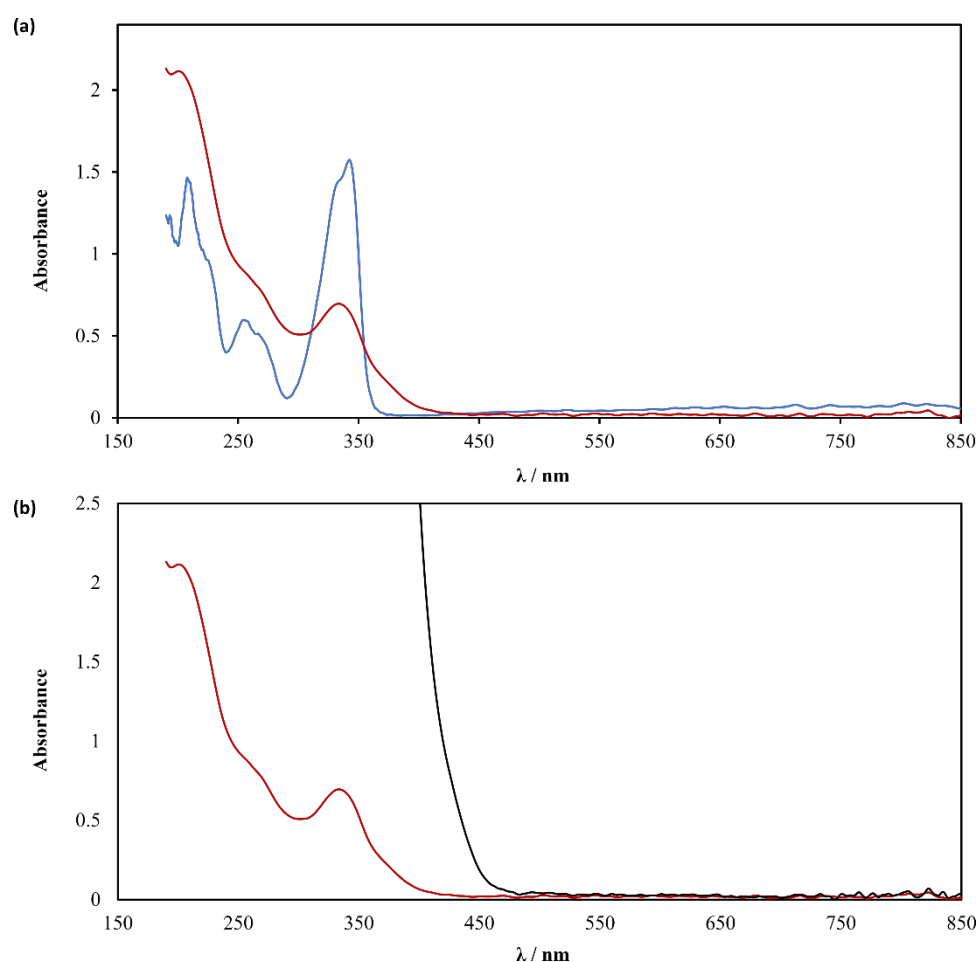

**Supplementary Figure 1.** (a) UV-Vis spectra of 6-TGH (blue) and of Ag-thioguanosine, **1**, (red), both in aqueous solution at a concentration of 1 mmol l<sup>-1</sup>. (b) UV-Vis spectra of a solution of Ag-thioguanosine at a concentration of 1 mmol l<sup>-1</sup> (red) and of a gel of Ag-thioguanosine at a concentration of 30 mmol l<sup>-1</sup> (black). The samples were measured in a quartz cuvette with light-path of 0.1 mm.

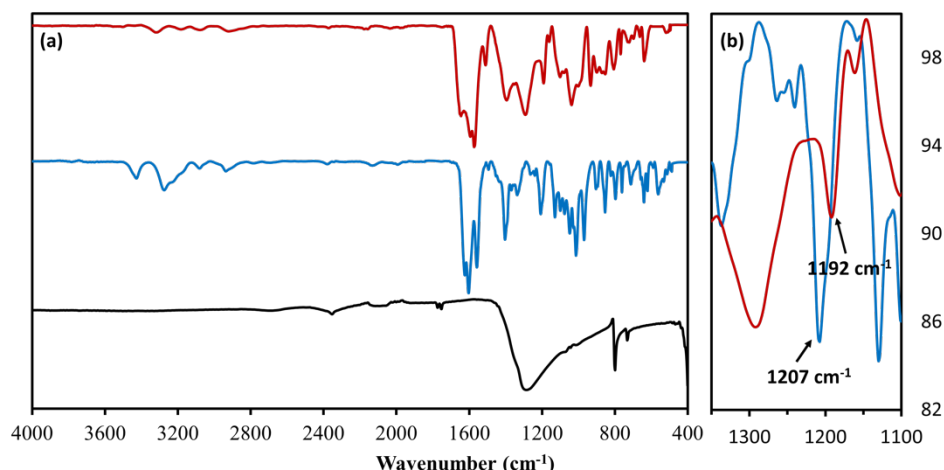

**Supplementary Figure 2.** (a) FTIR spectrum of Ag-thioguanosine gel (red), 6-thioguanosine (blue) and AgNO<sub>3</sub> (black). (b) Zoom in area in the spectra shows the region between 1100 and 1350 cm<sup>-1</sup>.

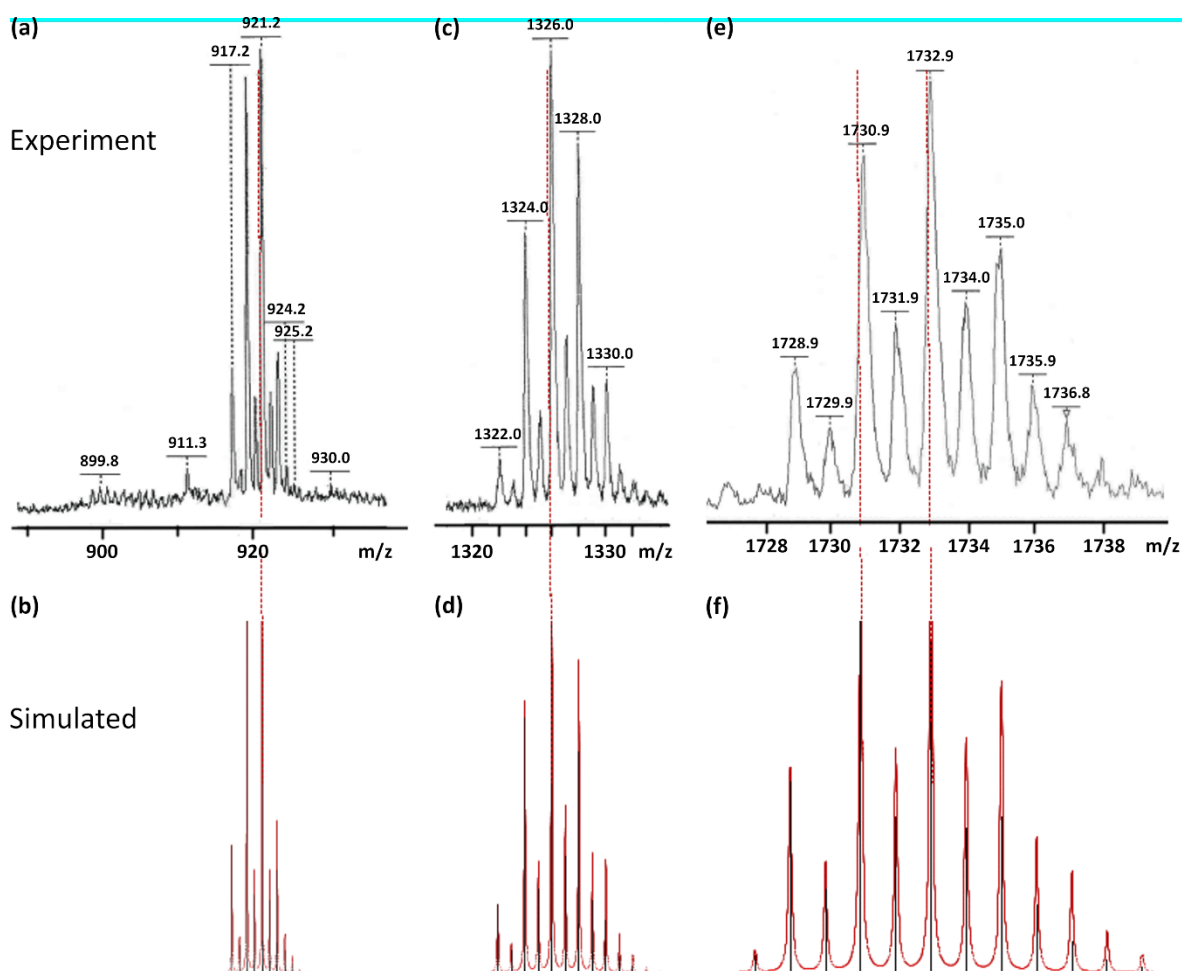

**Supplementary Figure 3.** MALDI data measured for Ag-thioguanosine. L = singly deprotonated form of thioguanosine, [C<sub>10</sub>H<sub>12</sub>N<sub>5</sub>O<sub>4</sub>S]<sup>-</sup>. (a) [Ag<sub>3</sub>L<sub>2</sub>]<sup>+</sup> experimental, (b) [Ag<sub>3</sub>L<sub>2</sub>]<sup>+</sup> simulated; (c) [Ag<sub>4</sub>L<sub>3</sub>]<sup>+</sup> experimental, (d) [Ag<sub>4</sub>L<sub>3</sub>]<sup>+</sup> simulated and (e) [Ag<sub>5</sub>L<sub>4</sub>]<sup>+</sup> experimental, (f) [Ag<sub>5</sub>L<sub>4</sub>]<sup>+</sup> simulated. The red dotted lines show selected corresponding peaks in simulated and experimental spectra; the m/z values are tabulated below.

| Species                     | Experimental m/z | Simulated m/z |
|-----------------------------|------------------|---------------|
| $[\text{Ag}_3\text{L}_2]^+$ | 921.2            | 920.84        |
| $[\text{Ag}_4\text{L}_3]^+$ | 1326.0           | 1325.80       |
| $[\text{Ag}_5\text{L}_4]^+$ | 1730.9           | 1730.77       |
| $[\text{Ag}_5\text{L}_4]^+$ | 1732.9           | 1732.77       |

Isotope pattern simulation using Gabedit v2.5.1.<sup>10</sup>

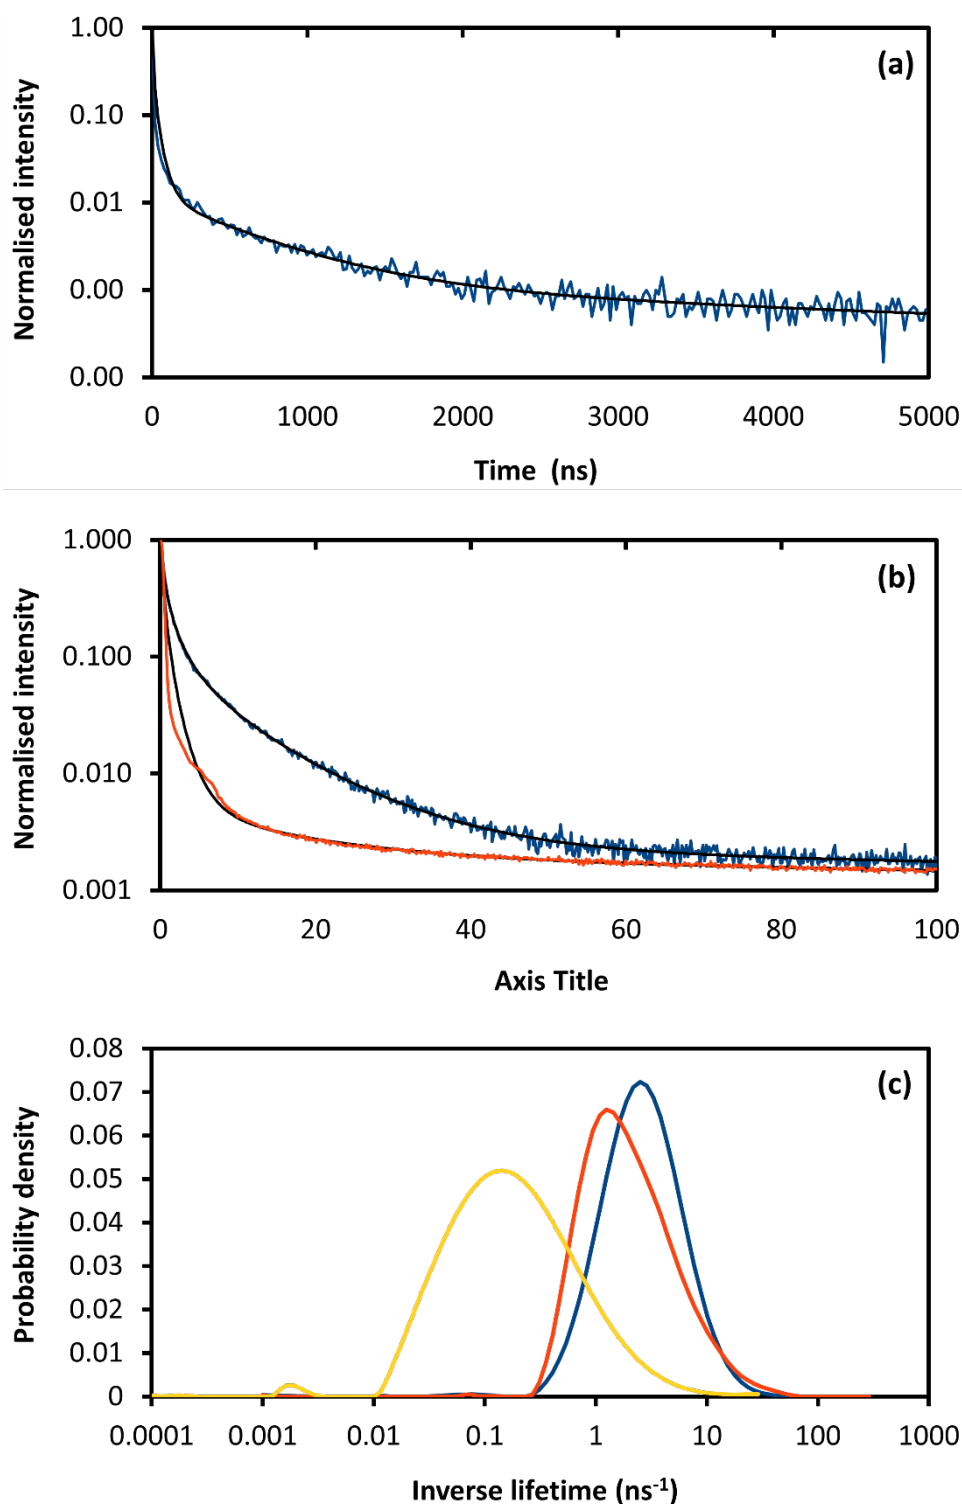

**Supplementary Figure 4.** (a) Normalised intensity against time for the luminescence decay of a gel of *I* at 30 mmol concentration and fit. The excitation wavelength was 371 nm and the emission at 510 nm was recorded against delay time in a TCSPC experiment with  $10^6$  counts. (b) Normalised intensity against time for the luminescence decay of ligand (6-thioguanosine, red line) and *I* (blue line) at 5  $\mu\text{mol}$  concentration and fits. The excitation wavelength was 371 nm and the emission at 430 nm was recorded against delay time in a TCSPC experiment with  $10^6$  counts. (c) Distribution of inverse lifetimes extracted from the fitting of the PL decays. blue curve - ligand; orange curve - 5  $\mu\text{mol l}^{-1}$  (*I*) and yellow curve (*I* gel) - 30 m mol  $\text{l}^{-1}$ . Note that a multiexponential fit is equivalent to approximating the distributions by delta functions.

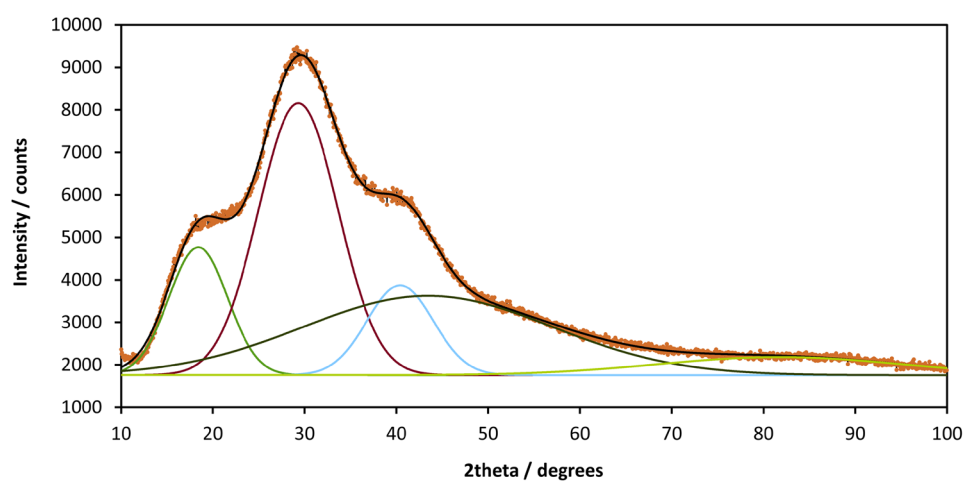

**Supplementary Figure 5.** Powder X-ray diffraction pattern for Ag-thioguanosine. The fitted regression model (black line) was a sum of 5 Gaussian functions and the coloured lines show the individual Gaussians. The peak at  $2\theta = 29.3$  degrees can be interpreted as an Ag...Ag distance of 3.04 Å.



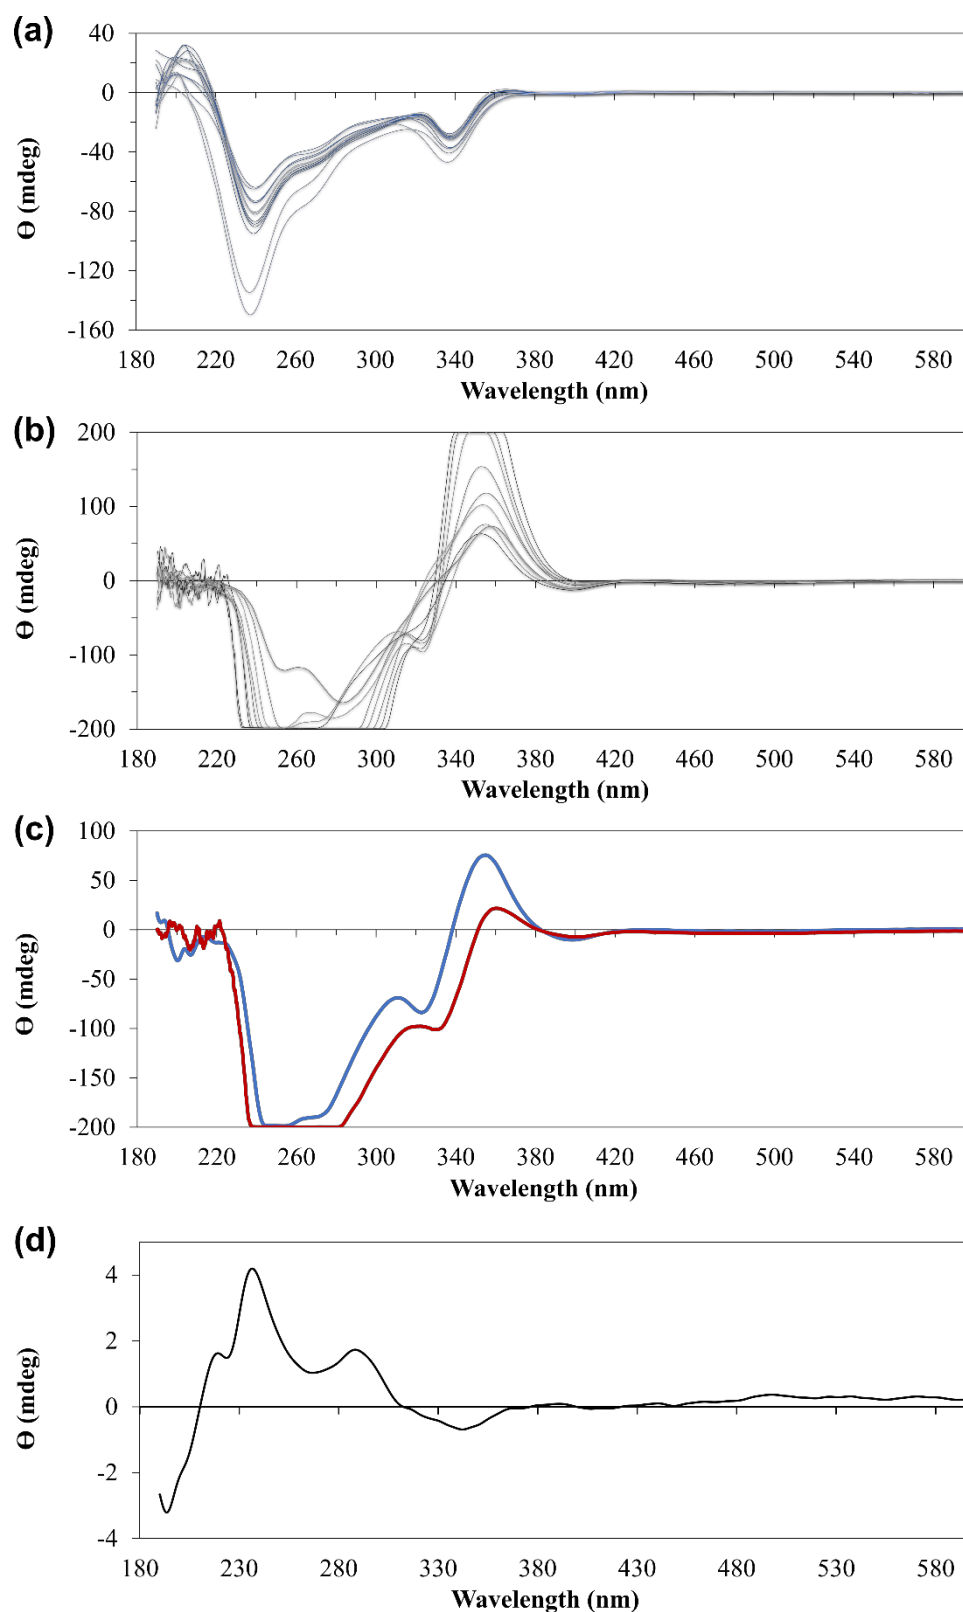

**Supplementary Figure 6.** CD spectra of Ag-thioguanosine, **1**, (a) solution at a concentration of  $10 \text{ mmol l}^{-1}$  and (b) a gel at concentration of  $30 \text{ mmol l}^{-1}$ . The CD spectra (a-b) show data from 12 replicated experiments. (c) CD spectra of a gel of Ag-thioguanosine at a concentration of  $30 \text{ mmol l}^{-1}$  formed with clockwise (red) and anticlockwise (blue) stirring. (d) CD spectrum of an aqueous solution of 6-TGH

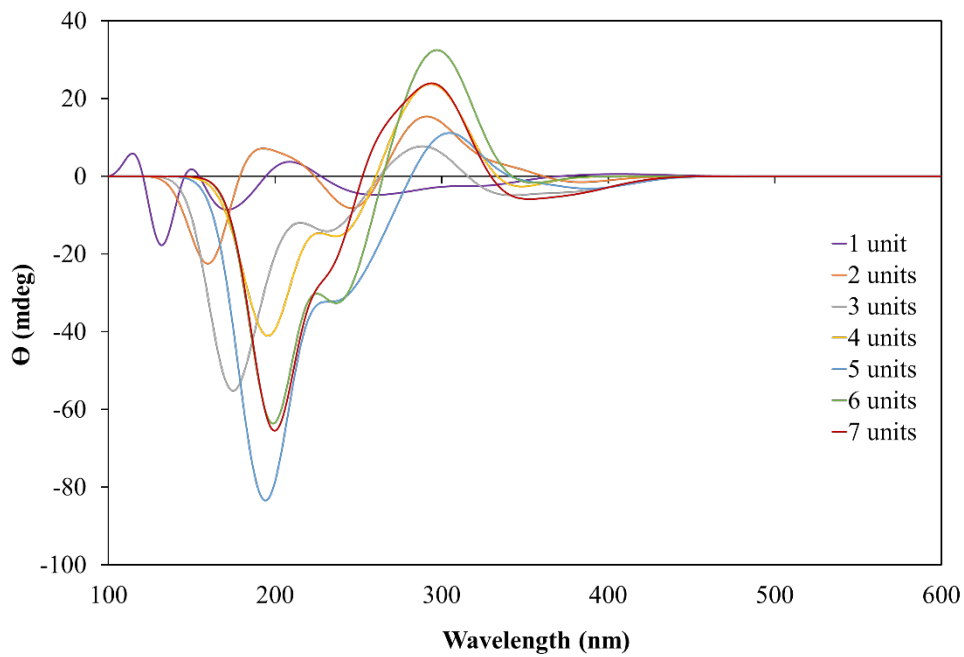

**Supplementary Figure 7.** Circular dichroism spectra calculated for 1-7 units of the Ag-thioguanosine structure.

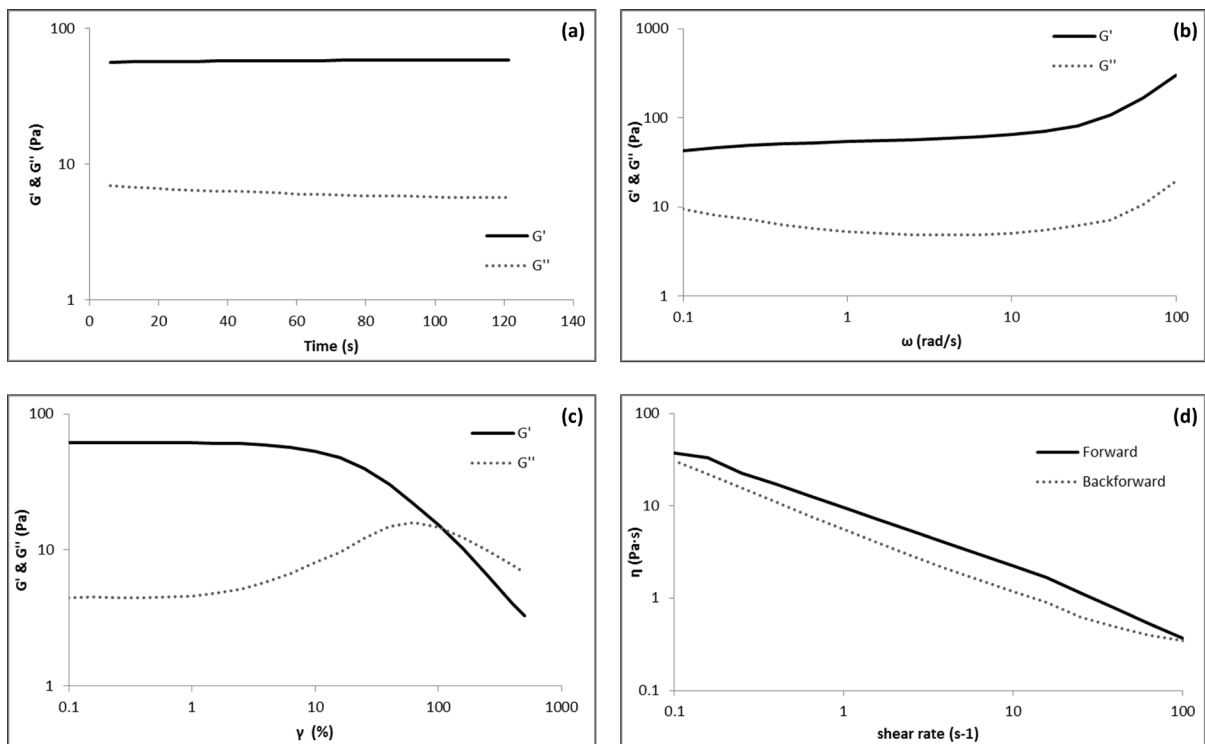

**Supplementary Figure 8.** Rheological characterisation of Ag-thioguanosine at 30 mmol l<sup>-1</sup>. (a) Time sweep experiments. (b) Frequency sweep experiments. (c) Amplitude sweep experiments at 30 mmol l<sup>-1</sup>. (d) Viscosity versus shear rate profile between 0.1 and 100 s<sup>-1</sup>.

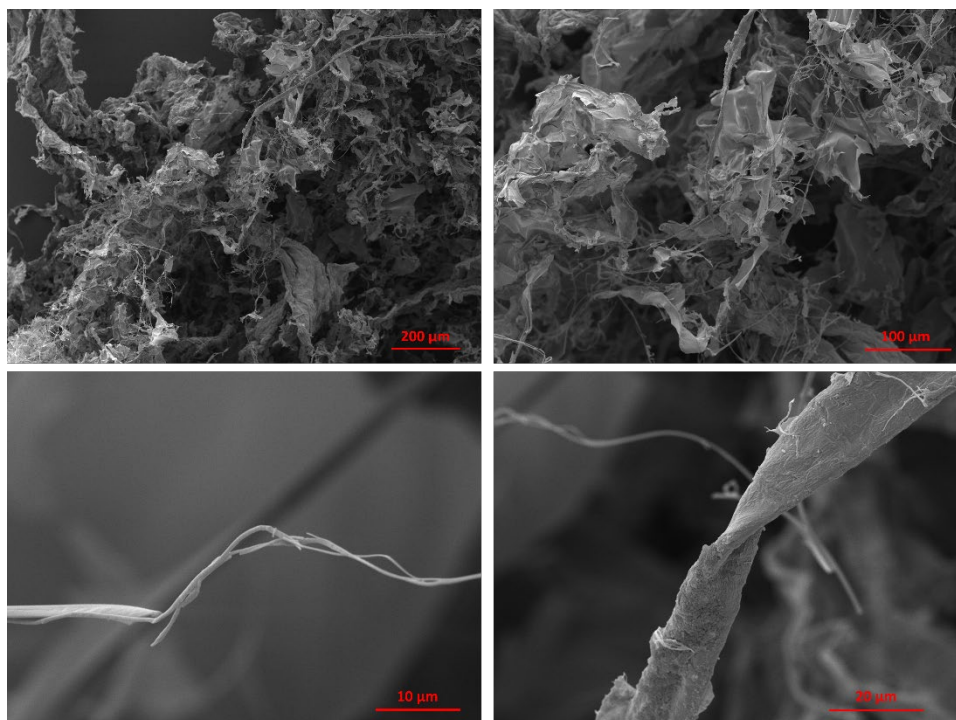

**Supplementary Figure 9.** SEM images of Ag-6TG at concentration of 6 mmol l<sup>-1</sup> after the solution was freezing dried.

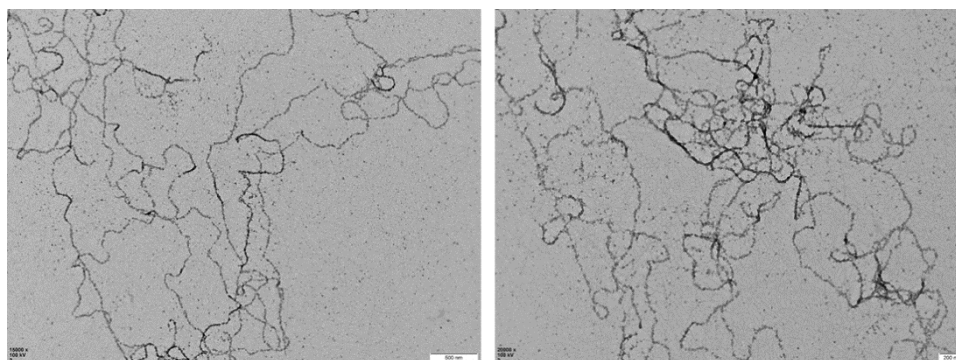

**Supplementary Figure 10.** TEM images of Ag:6-TG xerogel. 1 mmol l<sup>-1</sup> Ag-thioguanosine solution was dried on continuous carbon coated grids.

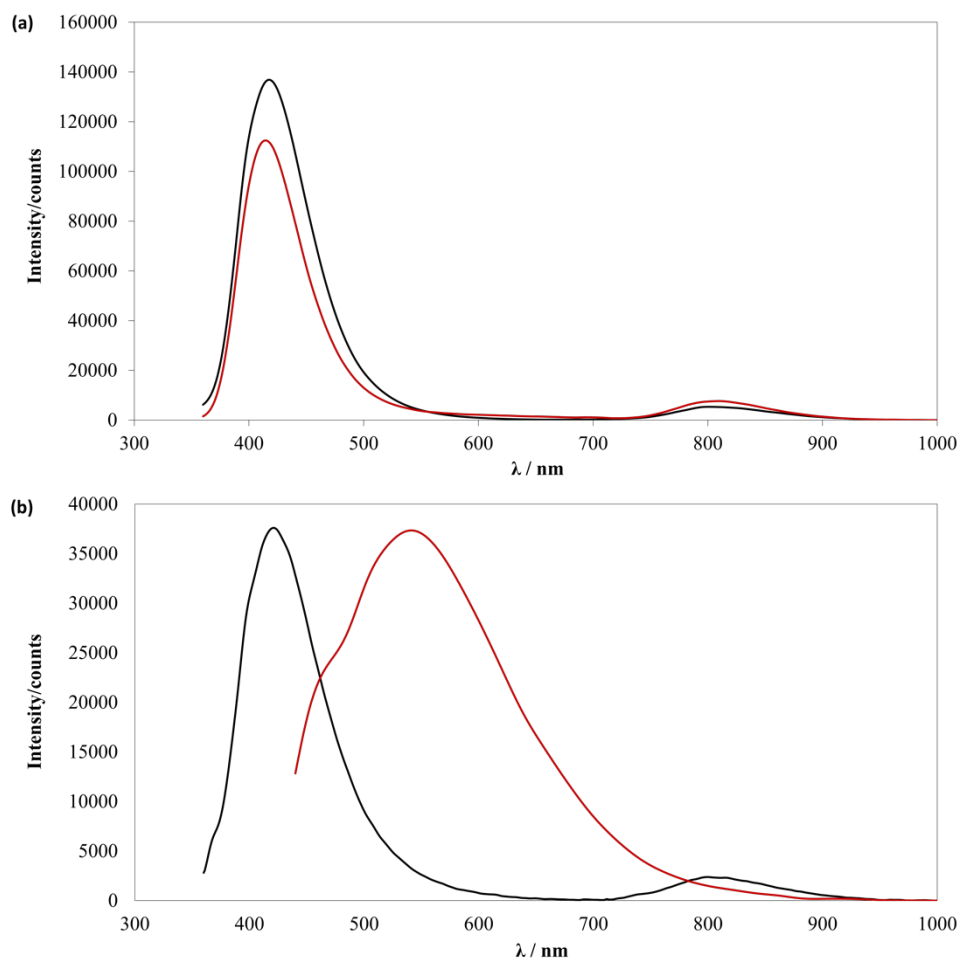

**Supplementary Figure 11.** (a) Fluorescence emission spectra of a solution of 6-TGH nucleoside in  $0.1 \text{ mol l}^{-1}$  of NaOH (black) and of an aqueous solution of Ag-thioguanosine (red), both at a concentration of  $1 \text{ mmol l}^{-1}$ . The excitation wavelength was 350 nm and the pathlength was 1 cm. (b) Fluorescence emission spectra of a solution of 6-TGH nucleoside in  $0.1 \text{ mol l}^{-1}$  of NaOH (black) and a gel of Ag-thioguanosine (red), both at a concentration of  $30 \text{ mmol l}^{-1}$ . The excitation wavelength was 350 nm for the 6-TGH solution and 430 nm for the Ag-thioguanosine gel and the pathlength was 10 mm.

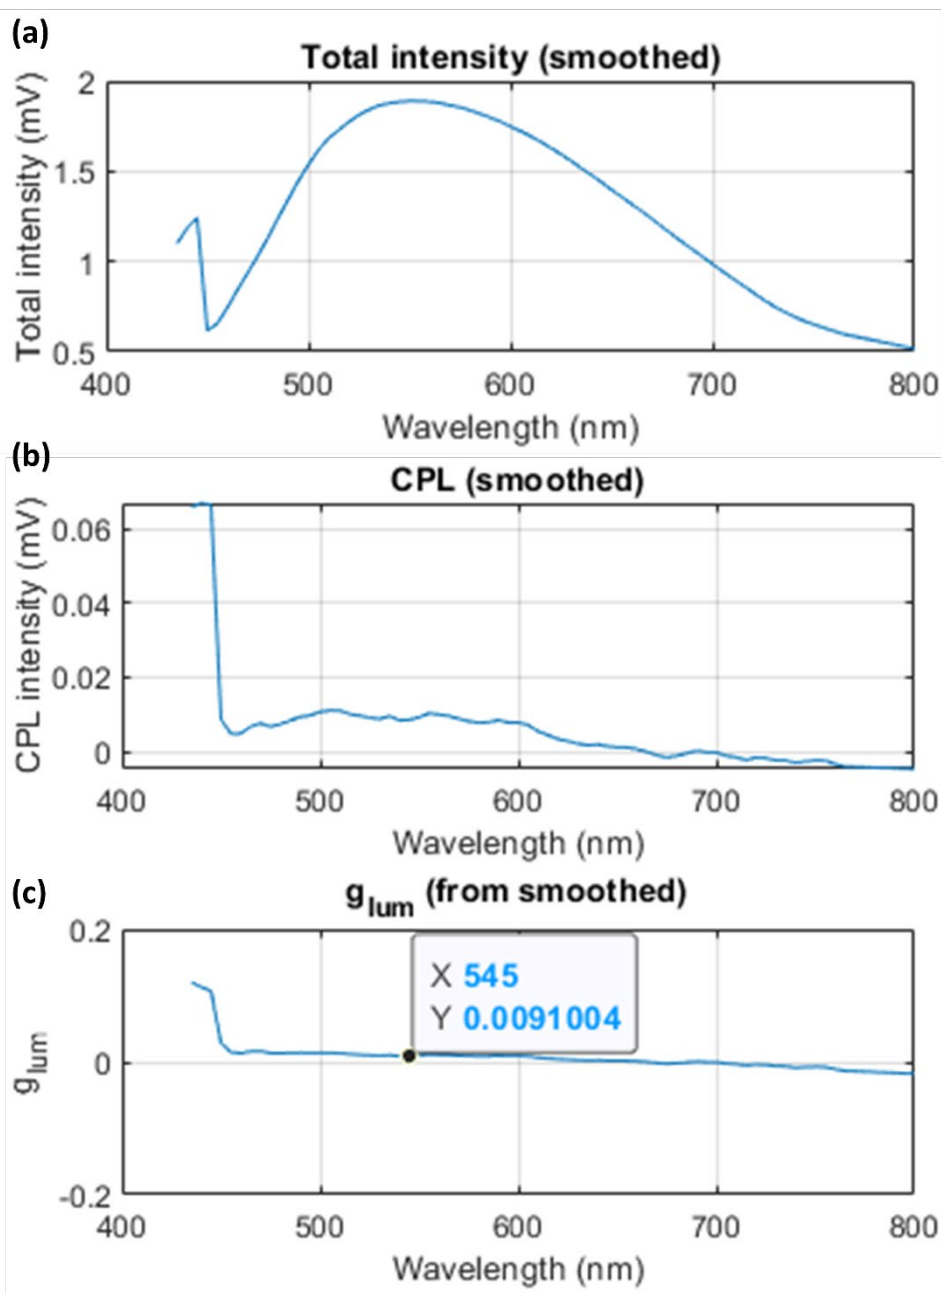

**Supplementary Figure 12.** (a) Total photoluminescence spectrum of Ag-thioguanosine solution at concentration of  $10 \text{ mmol l}^{-1}$ . (b) CPL smoothed spectrum of the Ag-thioguanosine solution. (c) The luminescence dissymmetry factor ( $g_{lum}$ ) data from the smoothed spectrum of the Ag-thioguanosine shows a  $g_{lum}$  value of about 0.01. The excitation wavelength was 410 nm, which can be seen as an artefact in CPL and  $g_{lum}$  spectra.

## Supplementary references

- 1 F. Neese, *Wiley Interdiscip. Rev. Comput. Mol. Sci.*, 2012, **2**, 73-78.
- 2 F. Neese, *Wiley Interdiscip. Rev. Comput. Mol. Sci.*, 2018, **8**, 1327.
- 3 S. Hirata and M. Head-Gordon, *Chem. Phys. Lett.*, 1999, **314**, 291-299.
- 4 F. Weigend and R. Ahlrichs, *Phys. Chem. Chem. Phys.*, 2005, **7**, 3297-3305.
- 5 C. Adamo and V. Barone, *J. Chem. Phys.*, 1999, **110**, 6158-6170.
- 6 S. Grimme, *J. Comput. Chem.*, 2006, **27**, 1787-1799.
- 7 D. M. York and M. Karplus, *J. Phys. Chem. A*, 1999, **103**, 11060-11079.
- 8 S. Grimme, F. Furche and R. Ahlrichs, *Chem. Phys. Lett.*, 2002, **361**, 321-328.
- 9 R. Carr, R. Puckrin, B. K. McMahon, R. Pal, D. Parker and L. O. Palsson, *Methods Appl. Fluoresc.*, 2014, **2**.
- 10 A. R. Allouche, *J. Comp. Chem.*, 2011, **32**, 174-182.
